# Supplementary material for: Clinical outcomes with all-oral regimens in patients of drug-resistant tuberculosis: A prospective study in a tertiary hospital in North India
Source: Research Square preprint supplement (doi:10.21203/rs.3.rs-5309694/v1), 2024-10-24
Supplement: Supplementary file 1 [file 3a15f6789f700eabd050087c.docx]

|  | **Author (Year)** | **Type of study, sample size** | **Regimen** | **Successful/**  **favorable outcome** | **Adverse events (AEs) (% of participants)** | |
| --- | --- | --- | --- | --- | --- | --- |
| 1 | Korotych O et al (2024) | Multicountry prospective, cohort study, n=2636 | Bdq, Lzd, Lfx, Cfz, Cs or Bdq, Lzd, Lfx, Cfz, Dlm for 9 months (in case of suspected resistance or intolerance to cycloserine) | Cumulative probability of not having an unsuccessful outcome: 87% after 6 months and 79% after 22 months. | 9 % (Grade 3 or higher AEs) | Myelosuppression (4·9%)  QTc interval prolongation (1·7%)  Peripheral neuropathy (1·1%)  Hepatitis (0·9%)  Optic neuritis (0·6%)  Acute kidney injury (0·5%)  Hypokalaemia (0·2%) |
| 2 | Goodall RL et al (2022) | Open-label, multicentre, randomized, non-inferiority trial, n=211 in the short oral arm of 40 weeks | Bdq, Lfx, Cfz, Z, E for 40 weeks with H, Pto for intensive phase of 16 weeks | 83% | 50%  (Grade 3-4 AE) | QTc interval prolongation (3%)  ALT or AST >5-times ULN (15%)  ALT >3-times and total bilirubin >2-times ULN (7%)  Hearing loss graded 3 or 4 on the Brock scale (2%) |
| 3 | Nguyen TMP et al (2023) | Prospective cohort study, n=106, assessed for bacteriological conversion, n= 74 | Bdq, Lfx, Lzd, Cfz, and Z) for 9-11 months | 89.6% | 29.6%  Of total AEs, 29% were serious and 26.6% were of grade 3 or 4 | Increase in ALT > 1.1 times the ULN  Hypokalemia (4.6%)  Arthralgia (4.6%)  QTc interval prolongation (3.7%)  Peripheral neuropathy (2.8%)  Hematological disorders (2.8%) |
| 4 | Padmapriyadarsini C (2022) | Prospective cohort study, n=152 | Bdq, Lzd, Cfz, Dlm for 24-36 weeks in adults with Pre-XDR TB | 91% | 17.1% | Skin pigmentation (55%)  Hematological disorders (52%)  Increase in liver enzymes (47%)  Peripheral neuropathy (42%)  Pancreatic enzymes elevation (15%)  QTc interval prolongation (10%)  Chest pain (1%) |
| 5 | Ur Rehman O et al (2023) | Meta-analysis | Bedaquiline containing oral and injectable regimens | 76. 9% (Observational studies)  81.7% (clinical trials) | Any AE | The pooled rate of Adverse events:  QTc prolongation (10.2%)  Hepatotoxicity (12.6%)  Hematological disorders (12.5%)  Peripheral neuropathy (13.9%)  Gastrointestinal symptoms (13.8%)  Arthralgia (10.1%)  Renal disorders (5.9%)  Hearing loss (7%)  Optic neuritis (3.9%)  Electrolyte disturbances (6.4%)  Dermatological disorders (9.8%)  Psychiatric disorders (4.6%) |

**Supplementary Table 1: Studies on various new short-oral and long-oral regimens of Drug-resistant tuberculosis**

ALT: Alanine transaminase, AST: Aspartate transaminase, ULN: Upper limit of normal
