# Supplementary material for: Clinical outcomes with all-oral regimens in patients of drug-resistant tuberculosis: A prospective study in a tertiary hospital in North India
Source: Research Square preprint supplement (doi:10.21203/rs.3.rs-5309694/v1), 2024-10-24
Supplement: Supplementary file 2 [file 5e95fe1ba97caba8d0b90f2a.docx]

| Total, n=100 | |
| --- | --- |
| Age  Median (Q1-Q3) | 24 (19.75-38.5) |
| Male: female | 49/51 |
| Body mass index  Mean ± SD | 19.2 3.4 |
| Co-morbidities | Diabetes mellitus (n=9)  Hypertension (n= 5)  Asthma/Chronic obstructive lung disease (n=2)  Hypothyroidism (n=1) |
| H/o Covid vaccination | Yes (n=56)  No (n=11)  Not known (n=33) |
| Cases of DR-TB | Newly diagnosed (n=97)  Previously diagnosed (n=3) |
| Organ affected | Pulmonary (n=84)  Pleural and pulmonary (n=3)  Pleural (n=4)  Lymph node (n=5)  Pulmonary+ Lymph nodes (n=3)  Pulmonary + Bone (n=1) |
| Baseline chest radiography | Abnormal (n=95) |
| Duration of symptoms (in months)  Median (Q1-Q3) | 3 (3-5) |
| H/o intake of anti-tubercular drugs | Yes (n=34) |
| Form of drug-resistant tuberculosis | RR-TB (n=90)  Pre-XDR TB (n=10) |
| Baseline vision | Normal (n=88)  Decreased visual acuity (n= 12) |
| Baseline hearing function | Normal (n=97)  Hearing impairment (n= 3) |

**Table 1:** **Baseline characteristics of patients of drug-resistant tuberculosis (DR-TB).**
