# Supplementary material for: Clinical outcomes with all-oral regimens in patients of drug-resistant tuberculosis: A prospective study in a tertiary hospital in North India
Source: Research Square preprint supplement (doi:10.21203/rs.3.rs-5309694/v1), 2024-10-24
Supplement: Supplementary file 3 [file 8087ed083d8db0c1a808735b.docx]

|  |  |  | Longer oral regimen | | |  |  |
| --- | --- | --- | --- | --- | --- | --- | --- |
| Regimen | Time of assessment | Number of patients | Number of patients with AEs | Adverse events leading to modification in regimen | Steps taken | LNZ dose reduction | LNZ stopped |
| BQLCC | 1 month | 64 | 9 | Peripheral neuropathy (n=6)  Peripheral neuropathy and thrombocytopenia (n=1) | - Lzd dose reduced to 300 mg (n =7) | 7 |  |
| Hepatotoxicity(n=1) | - All drugs were held for a week and then restarted |  |  |
| Anemia (n=1) | - Lzd stopped, Dlm added. |  | 1 |
|  | 3 month | 52 | 20 | Peripheral neuropathy (n=16) | - Lzd dose reduced to 300 mg (n=11) - Lzd stopped, Dlm added (n=3) - Lzd stopped, Z added (n=1) - Lzd stopped, E added (n=1), later Bdq extended, and Z added at 6m | 11 | 5 |
| Optic neuritis (n=1) | - Lzd stopped, Dlm added (n=1) |  | 1 |
| Anemia (n=1) | - Lzd stopped, Z added (n=1) |  | 1 |
| Tendinitis (n=1) | - Lfx changed to Mfxh |  |  |
| Anemia and peripheral neuropathy (n=1) | - Lzd dose reduced to 300 mg daily, n=1 | 1 |  |
|  | 6 month | 42 | 11 | Peripheral neuropathy (n=9) | - Lzd dose reduced to 300 mg daily (n=7) - Lzd stopped, Z added (n=2) | 7 | 2 |
| Anemia with peripheral neuropathy (n=1) | - Lzd stopped, Z added (n=1) |  | 1 |
| Agitation and anxiety (n=1) | - Cs stopped; Z added, (n=1) |  |  |
|  | | | | | | 26 | 11 |
| BDLCC |  |  |  |  |  |  |  |
|  | 1 month | 7 | -- |  |  |  |  |
|  | 3 month | 16 | 2 | Peripheral neuropathy (n=2) | - Lzd dose reduced to 300mg daily (n=2)# | 2 |  |
|  | 6 month | 17 | 4 | Peripheral neuropathy (n=3)  Optic neuritis and peripheral neuropathy (n=1) | - Lzd dose reduced to 300 mg daily (n=2) - Lzd stopped and Z added=1 - Lzd stopped, Z added, Bdq extended (n=1) | 2 | 1  1 |
|  | | | | | | 4 | 2 |
| BELCC | 1 month | 3 | -- | -- |  |  |  |
|  | 3 month | 4 | -- | -- |  |  |  |
|  | 6 month | 4 | 3 | Peripheral neuropathy (n=3) | - Lzd dose reduced to 300mg daily, n=3 | 3 | -- |
| Total |  | | | | | 33 | 13 |
| Shorter oral regimen | | | | | |  |  |
|  | 1 month | 17 | 1 | Hepatotoxicity(n=1) | - All drugs were held and restarted after 1 week. | -- | -- |
|  | 3 month | 17 | 2 | Peripheral neuropathy (n=1)  Peripheral neuropathy and joint pain (n=1) | - Hh reduced to 600 mg (n=1) * - Hh reduced to 300 mg (n=1) | -- | -- |
|  | 6 months | 17 | 2 | Peripheral neuropathy (n=2) | - Hh reduced to 300 mg (n=2) | -- | -- |

**Table 3: Adverse events necessitating treatment modification and steps taken to manage the adverse events in patients of all oral regimens of drug-resistant tuberculosis.**

#One of these patients developed optic neuritis at 6 months for which Linezolid was finally stopped, Z added and Bedaquiline extended as mentioned subsequently in the table. *The dose of isoniazid was finally reduced to 300 mg at 6 months. This patient is one of the two patients in whom the Hh dose was reduced to 300 mg at 6 months.
