# Supplementary material for: Clinical outcomes with all-oral regimens in patients of drug-resistant tuberculosis: A prospective study in a tertiary hospital in North India
Source: Research Square preprint supplement (doi:10.21203/rs.3.rs-5309694/v1), 2024-10-24
Supplement: Supplementary file 4 [file cd9fe689e073426f4ec4da4e.docx]

| Factors or parameters | At | Long oral regimen | Regimen A | Regimen B | Regimen C | Regimen D | Regimen E | Regimen F | Short oral regimen |
| --- | --- | --- | --- | --- | --- | --- | --- | --- | --- |
|  | 1 month | 74 | n=64 | n=7 | n=3 | 1 | -- | -- | 17 |
|  | 3 month | 73 | n=52 | n=16 | n=4 | n=1 |  |  | 17 |
|  | 6 month | 73 | n=46 | n=17 | n=4 | n=4 | n=1 | n=1 | 15 |
| Microbiological improvement  At 3 months  At 6 months  Cumulative smear or culture conversion in one sample   - 2nd sample negative for M.Tb in |  | 17 (23.3)  45 (61.6) @  62 (84.9)  41 (66.1%) | 13 (25)  31 (67.4)  44 (92.4)  -- | 2 (12.5)  10 (58.8)  12 (71.3)  -- | 2 (50)  1 (25)  3 (75)  -- | --  4 (100)@  4 (100)  -- | --  1@  -- | --  --  -- | 7 (41.2)  4 (26.7)  11 (67.9)  6 (54.5) |
| Patient-reported clinical improvement at 6 months  <50%  ≥ 50% |  | 4  69 (94.5) | 1  45 | 2  15 | --  4 | --  4 | 1  -- | --  1 | 1  14 (93.3) |
| Duration of follow-up (in months) (Mean ± SD)  Range |  | 7.1 ± 2.5  6-18 |  |  |  |  |  |  | 7.6 ± 1.5  6-9 |
| AEs causing treatment modification | Any time  1 month  3 month  6 month | 40 (54.8)  9 (12.2)  22 (30.1)  18 (24.6) | 9 (14.1)  20 (38.5)  11 (23.9) | --  2 (12.5)  4 (23.5) | --  --  3 (75) | -- | -- | -- | 4 (26.7)  1 (5.8)  2 (11.8)  2 (13.3) |
| Peripheral neuropathy (PN)  PN requiring treatment modification occurring in  Patients requiring treatment modification | Any time  Any time  1 month  3 month  6 month  1 month  3 month  6 month | 41 (56.2)  34 (46.6)  7 (9.5)  14 (19.2)  13 (17.8)  7 (9.5)  19 (26)  17 (23.3) | 30  26 (49.2)  7 (10.9)  12 (23.1)  7 (15.2)  7 (10.9)  17 (32.7)  10 (21.7) | 7  5 (30.1)  --  2 (12.5)  3 (17.6)  --  2 (12.5)  4 (23.5) | 4  3 (75)  --  --  3 (75)  --  --  3 (75) | --  --  --  --  --  --  --  -- | --  --  --  --  --  --  --  -- |  | 3 (19.1)  3 (19.1)  --  1 (5.8)  2 (13.3)  --  2  2 |
| Skin pigmentation | Any time | 32 (43.8) |  |  |  |  |  |  | 5 (33.3) |
| Fall in hemoglobin by > 2gm/dL  Anemia causing treatment modification | Any time  1 month  3 month  6 month  Any time  1 month  3 month  6 month | 26 (35.6)  8 (10.8)  16 (21.9)  23 (31.5)  3 (4.1) | 8 (12.5)  14 (26.9)  15 (32.6)  3  1 (1.6)  1 (1.9)  1 (2.2) | --  1 (6.2)  5 (29.4)  -- | --  1  2  -- | --  --  --  1  -- | --  --  --  --  -- | --  --  --  --  -- | 2  --  --  2 (13.3)  -- |
| ↓ in platelet count by > 50% from baseline  Thrombocytopenia causing treatment modification | Any time  1 month  3 month  6 month | 19 (26)  12  12  13  1 (1.4) | 10 (15.6)  8 (15.4)  7 (15.2)  1 | 2 (28.6)  3 (18.7)  3 (17.6) | --  1  1 | --  --  2 | --  --  -- | --  --  -- | 3 (20)  --  3 (17.6)  2 (13.3)  -- |
| Hypokalemia (<3.5 mmol/L) * | Any time  1 month  3 month  6 month | 17 (23.3)  10  4  3 | 8 (12.5)  2 (3.8)  2 (4.3) | 1 (14.3)  1 (6.2)  1 (5.9) | 1  1  -- | --  --  --  -- | --  --  --  -- | --  --  --  -- | 5 (33.3)  3 (17.6)  --  2 (13.3) |
| Hyperuricemia  (> 7mg/dL) * | Any time  1 month  3 month  6 month | 12 (16.4)  5  3  5 | 5 (7.8)  1 (1.9)  2 (4.3) | --  2 (12.5)  2 (11.8) | --  --  1 | --  --  --  -- | --  --  --  -- | --  --  --  -- | 5  3 (17.6)  2 (11.7)  4 (26.6) |
| ↑ in liver enzymes (SGPT or SGOT) by >5 times of baseline  Any hepatitis-causing treatment modification | Any time  1 month  3 month  6 month | 10 (13.7)  4  4  8  1 | 3 (4.7)  2 (3.8)  2 (4.3)  1 | --  1 (6.2)  3 (17.6)  -- | 1  1  1  -- | --  --  1  -- | --  --  1  -- | --  --  --  -- | 1  --  --  --  1 |
| GIT symptoms (nausea, vomiting, dyspepsia) | Any time | 1 (1.4) | 1 | -- | -- |  |  |  | 5 |
| Joint pain | Any time | 4 (5.5) | 3 | 1 | -- |  |  |  | 2 |
| Hypothyroidism (TSH>5) * | At 6m | 4 (5.5) | 4 (8.7) | -- | -- |  |  |  | -- |
| ↑QTc (>450 ms) #  ↑ QTc (>500 ms) | At 6m | 4 (5.5)  -- | 3 (6.5) (2F, 1M) | 1 (5.8) (1F) | -- |  |  |  | --  -- |
| ↑ QTc from baseline by (msec)  ↑ PR from baseline by (msec) | At 6m | 15 (10-22.5)  6 (3-9) | 17.5 (10.75-22.25)  6 (5-9.25) | 15 (9.5-19.5)  6 (5.5-8.5) | 0.33  -3.3 |  |  |  | 9 (4.5-21)  7 (5-7) |
| Rash | Any time | 2 (2.7) | 2 | -- | -- |  |  |  | -- |
| Optic neuritis  Causing treatment modification | Any time  1m  3m  6m | 2 (2.7) | 1  --  1 (1.9)  -- | 1  --  --  1 (5.8) | -- |  |  |  | -- |
| Tendinitis | Any time | 1 (1.4) | 1 | -- | -- |  |  |  | -- |
| Neuropsychiatric symptoms | Any time | 1 (1.4) | 1 | -- | -- |  |  |  | 0 |
| Drowsiness | Any time | 1 (1.4) | 1 | -- | -- |  |  |  | 0 |
| Chest pain | Any time | 1 (1.4) | -- | 1 | -- |  |  |  | 0 |
| Lupus | Any time | -- | -- | -- | -- |  |  |  | 1 |

**Table 2: Rates and patterns of adverse events with all-oral longer and shorter regimens of drug-resistant tuberculosis.**

@ 45 patients had their first negative sample at 6 months: One patient each in regimen D and regimen E had the first sample negative with regimen A at 3 months*With normal values at baseline, # In no female patient, QTc prolongation was more than 470 milliseconds.

SGOT: Serum glutamate oxalate transaminase, SGPT: Serum glutamate pyruvate transaminase
